# Supplementary material for: Longitudinal assessment of health-span and pre-death morbidity in wild type Drosophila
Source: publisher site journal article supplement (doi:10.18632/aging.101880), 2019-03-27
Supplement: Supplementary file [file aging-v11i6-101880-supplementary-material-SD1.pdf]

SUPPLEMENTARY FIGURES

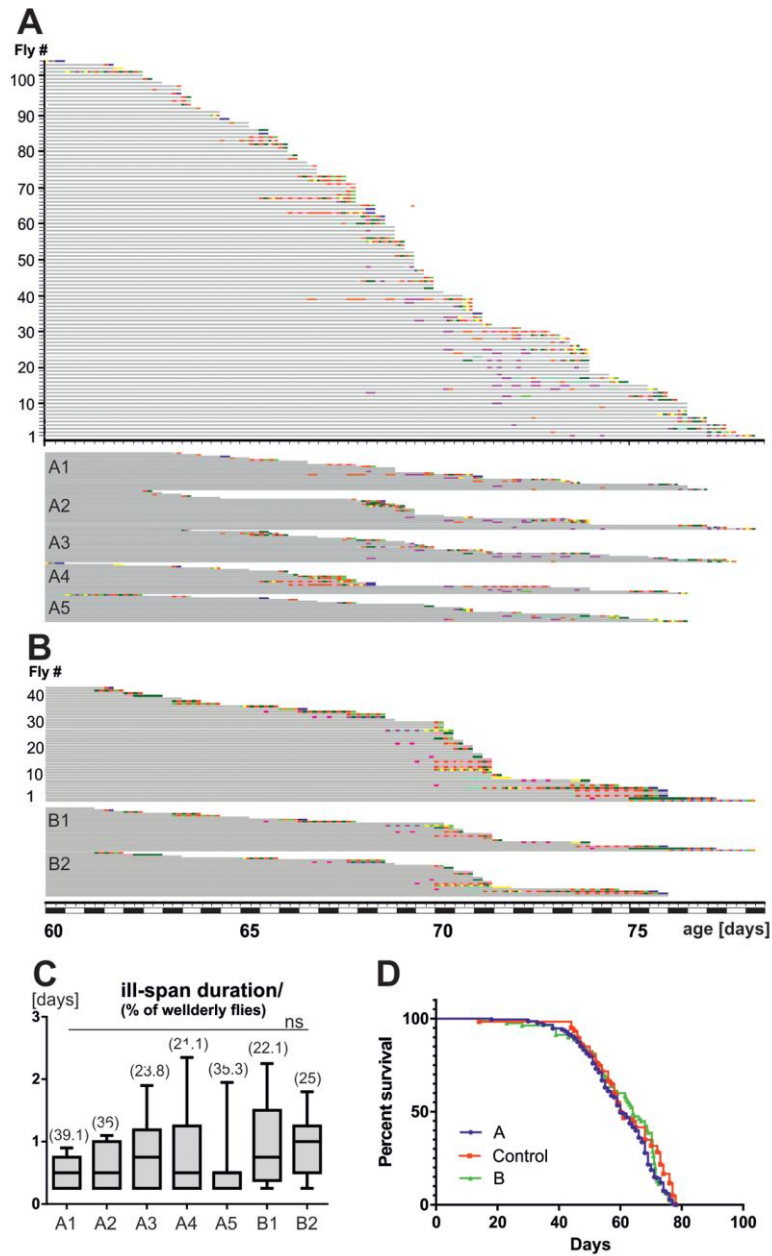

**Supplementary Figure 1. Two experimental runs reveal no differences in late life pathology.** (A) Life history chart of the 104 Oregon-R male flies shown in Figure 1A. (A1-A5) Five replicates of the cohort shown in A. (B) Life history chart of 48 male flies (2 replicates, B1, B2) individually tested in the startle assay every 6 hours from the age of 60 days until death. These flies derived from a different Oregon-R batch. As in Fig. 1A, B, C gray bars indicate health-span and colored bars different disability categories (see colored inset in Fig. 1A). Black and white bars on x-axis indicate day-night cycle. (C) The duration of ill-span is not statistically significant between groups (Kruskal-Wallis test  $p = 0.4425$ , Dunn's multiple comparisons posthoc test,  $p > 0.9999$  for all pairs). Numbers in parenthesis above bars indicate percentage of welllderly flies. (D) The survival curves of tested populations in A and in B and in the non-tested control flies are not significantly different (Logrank test for trend;  $X^2 = 3.110$ , 1 df,  $p = 0.0778$ ).

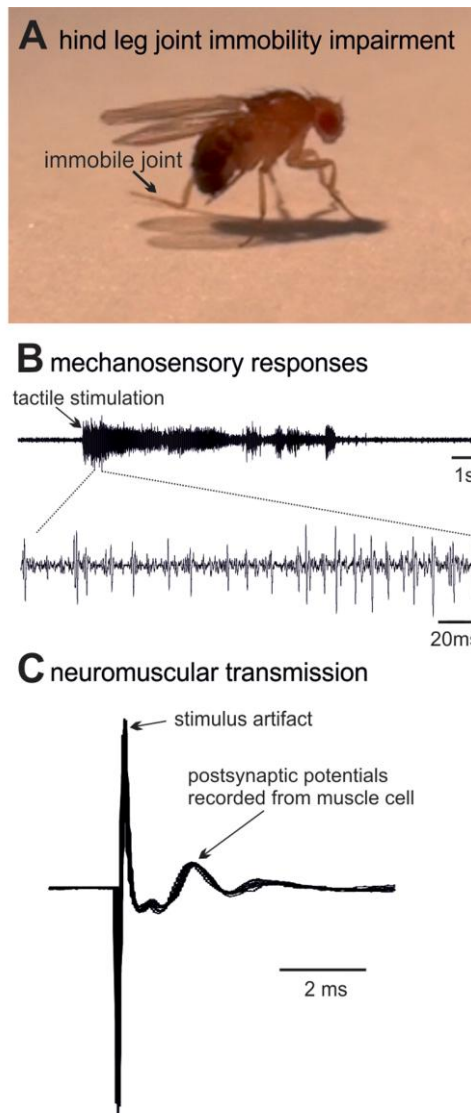

**Supplementary Figure 2. Sensory and muscle cells respond to stimulation in immobile legs.** (A) Photograph of a fly with a representative immobility impairment of the left hind leg (arrow) that caused leg dragging during walking. (B) Extracellular recording of sensory nerve activity in response to a tactile stimulation at the tibia. Arrow indicates time point of tactile stimulation. (C) Overlays of 10 sweeps of muscle potentials recorded extracellularly from the flexor tibia muscle in response to electrical stimulation of the leg motoneurons with a sharpened tungsten electrode.
